# Supplementary material
Source: publisher figshare collection journal article supplement (https://acs.figshare.com/ndownloader/files/29112981)
Supplement: Supplementary file 1 [file 29112981]

---

*Supporting Information for*

**Understanding the Correlation between Ga Speciation and Propane  
Dehydrogenation Activity on Ga/H-ZSM-5 Catalysts**

Yong Yuan<sup>1</sup>, Casper Brady<sup>1</sup>, Raul F. Lobo<sup>1</sup>, Bingjun Xu<sup>\*,1,2</sup>

<sup>1</sup>Center for Catalytic Science and Technology, Department of Chemical and Biomolecular  
Engineering, University of Delaware, Newark, Delaware 19716, United States

<sup>2</sup>College of Chemistry and Molecular Engineering, Peking University, Beijing 100871, China

Email: [b\\_xu@pku.edu.cn](mailto:b_xu@pku.edu.cn)

---

**Table S1.** Physical and chemical properties of H-ZSM-5 samples investigated in this work.

| Sample      | Si/Al ratio <sup>a</sup> | BAS density<br>( $\mu\text{mol}\cdot\text{g}^{-1}$ ) <sup>b</sup> | Micropore<br>volume <sup>c</sup><br>( $\text{cm}^3\cdot\text{g}^{-1}$ ) |
|-------------|--------------------------|-------------------------------------------------------------------|-------------------------------------------------------------------------|
| H-ZSM-5(15) | $15.4 \pm 1.3$           | 636                                                               | 0.12                                                                    |
| H-ZSM-5(28) | $27.5 \pm 1.9$           | 460                                                               | 0.12                                                                    |
| H-ZSM-5(39) | $39.0 \pm 2.8$           | 281                                                               | 0.13                                                                    |

<sup>a</sup>Determined by XRF.

<sup>b</sup>Measured by pyridine adsorption FTIR.

<sup>c</sup>Calculated with the *t*-plot method obtained from N<sub>2</sub> physisorption isotherms.

**Table S2.** Composition properties of the prepared Ga/H-ZSM-5 samples.

| Sample         | Ga/Al ratio <sup>a</sup> | Ga loading (%) <sup>a</sup> |
|----------------|--------------------------|-----------------------------|
| Ga/H-ZSM-5(15) |                          |                             |
|                | 0.014                    | 0.10                        |
|                | 0.024                    | 0.16                        |
|                | 0.042                    | 0.28                        |
|                | 0.061                    | 0.42                        |
|                | 0.074                    | 0.51                        |
|                | 0.083                    | 0.55                        |
|                | 0.13                     | 0.89                        |
|                | 0.21                     | 1.52                        |
|                | 0.31                     | 2.18                        |
|                | 0.45                     | 3.29                        |
|                | 0.56                     | 3.75                        |
|                | 0.7                      | 5.07                        |
|                | 1.0                      | 6.61                        |
|                | 1.3                      | 8.27                        |
|                | 1.7                      | 11.60                       |
| Ga/H-ZSM-5(28) |                          |                             |
|                | 0.025                    | 0.10                        |
|                | 0.071                    | 0.28                        |
|                | 0.097                    | 0.37                        |
|                | 0.15                     | 0.62                        |
|                | 0.32                     | 1.28                        |
|                | 0.44                     | 1.77                        |
|                | 0.52                     | 2.05                        |
|                | 0.7                      | 2.80                        |
|                | 1.0                      | 4.05                        |
|                | 1.3                      | 5.25                        |
|                | 1.7                      | 6.88                        |
| Ga/H-ZSM-5(39) |                          |                             |
|                | 0.12                     | 0.35                        |
|                | 0.26                     | 0.76                        |
|                | 0.44                     | 1.24                        |
|                | 0.55                     | 1.54                        |
|                | 0.67                     | 1.89                        |
|                | 1.0                      | 2.96                        |
|                | 1.3                      | 3.68                        |
|                | 1.7                      | 5.04                        |

<sup>a</sup>Determined by XRF.

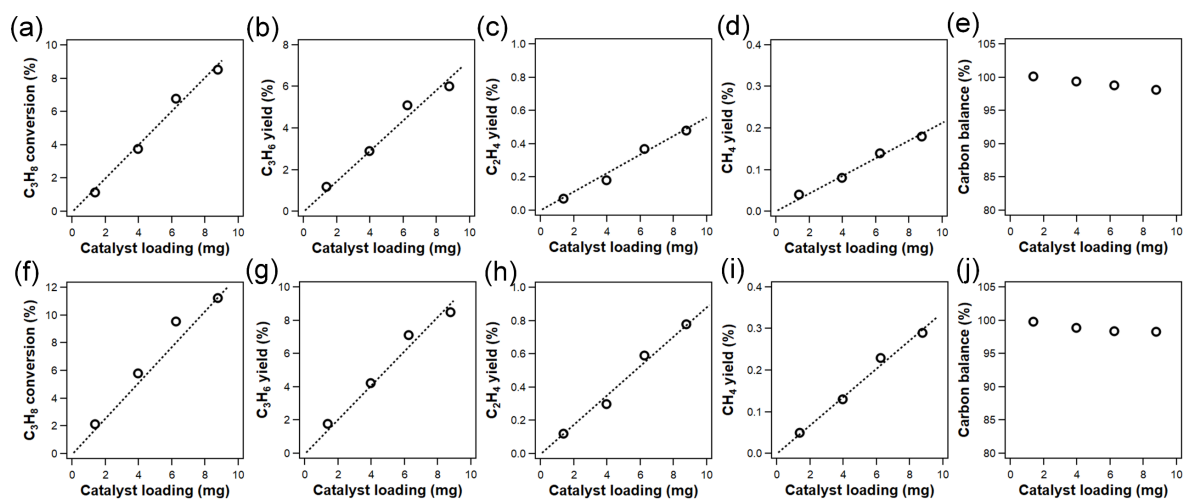

**Figure S1.** (a-e)  $C_3H_8$  conversion,  $C_3H_6$  yield,  $C_2H_4$  yield,  $CH_4$  yield and carbon balance as a function of the catalyst loading over Ga/H-ZSM-5 (Si/Al = 15 and Ga/Al = 0.21) at 550 °C. (f-j)  $C_3H_8$  conversion,  $C_3H_6$  yield,  $C_2H_4$  yield,  $CH_4$  yield and carbon balance as a function of the catalyst loading over Ga/H-ZSM-5 (Si/Al = 15 and Ga/Al = 0.21) at 570 °C. Reaction conditions:  $C_3H_8$  partial pressure, 5.07 kPa with balancing  $N_2$  (total flow rate was  $100 \text{ mL} \cdot \text{min}^{-1}$ ).



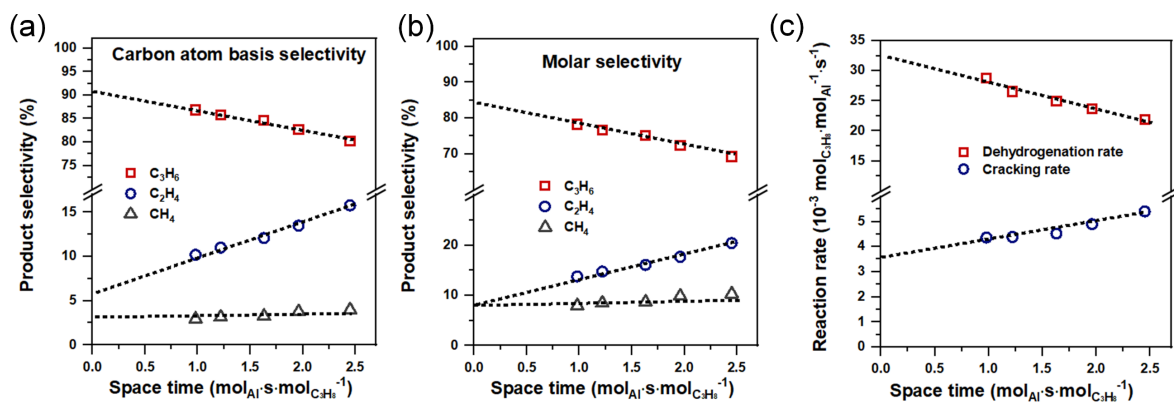

**Figure S2.** Product selectivity (a) on carbon atom basis and (b) on molar basis and (c)  $\text{C}_3\text{H}_8$  dehydrogenation rates and  $\text{C}_3\text{H}_8$  cracking rates (normalized by a per Al basis) as a function of space time over Ga/H-ZSM-5 ( $\text{Si}/\text{Al} = 15$  and  $\text{Ga}/\text{Al} = 0.21$ ). Reaction conditions: 550 °C;  $\text{C}_3\text{H}_8$  partial pressure, 5.07 kPa with balancing  $\text{N}_2$ . Dotted lines indicate linear extrapolations to zero space time.

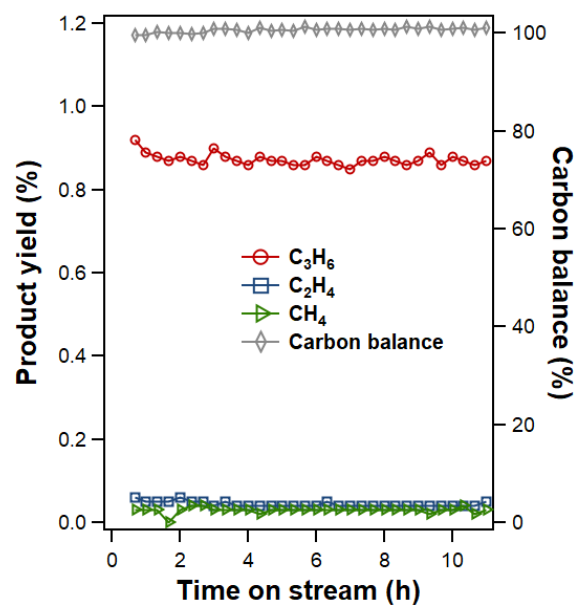

**Figure S3.** PDH product yield and carbon balance as a function of time on stream over Ga/H-ZSM-5 (Si/Al = 15 and Ga/Al = 1.0). Reaction conditions: 550 °C;  $C_3H_8$  partial pressure, 5.07 kPa with balancing  $N_2$ ; space time,  $1.17 \text{ mol}_{Al} \cdot \text{s} \cdot \text{mol}_{C_3H_8}^{-1}$ .

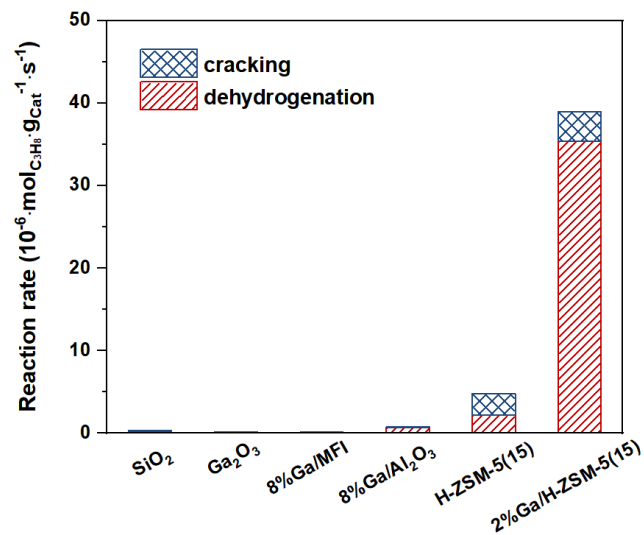

**Figure S4.**  $\text{C}_3\text{H}_8$  dehydrogenation rates and cracking rates over various catalysts. Reaction conditions: 550 °C;  $\text{C}_3\text{H}_8$  partial pressure, 5.07 kPa with balancing  $\text{N}_2$ ; space time, 13440  $\text{g}_{\text{Cat}} \cdot \text{s} \cdot \text{mol}_{\text{C}_3\text{H}_8}^{-1}$ . The propane conversions are below 5.5% in the rate measurements.

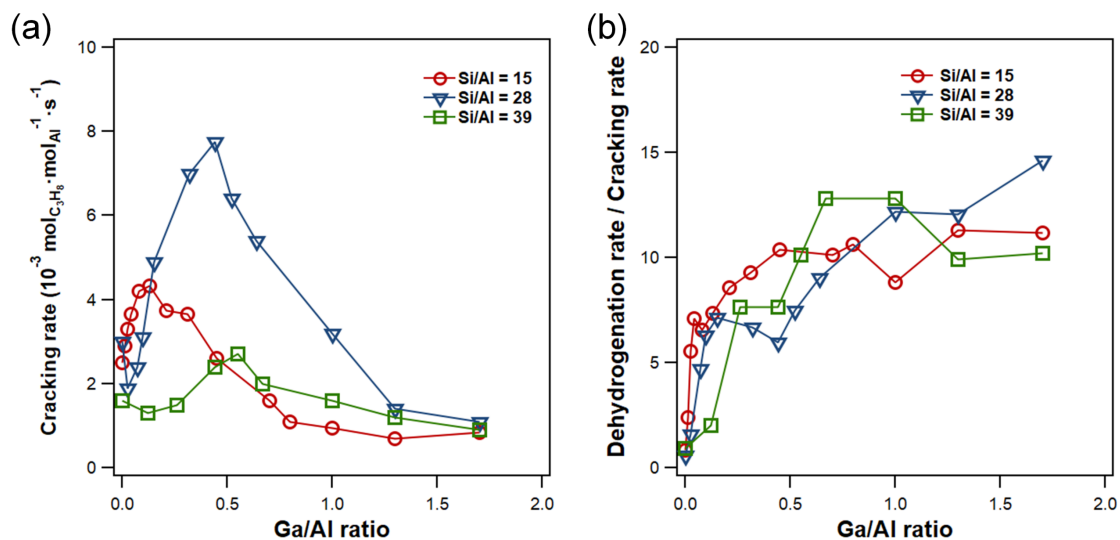

**Figure S5.** (a) C<sub>3</sub>H<sub>8</sub> cracking rate (normalized by a per Al basis) and (b) the ratio of C<sub>3</sub>H<sub>8</sub> dehydrogenation rate to C<sub>3</sub>H<sub>8</sub> cracking rate as a function of Ga/Al ratio on H-ZSM-5 with three Si/Al ratios (15, 28, 39). Reaction conditions: 550 °C; C<sub>3</sub>H<sub>8</sub> partial pressure, 5.07 kPa with balancing N<sub>2</sub>.

---

**Text S1. Simulation of PDH activation energy of exchanged Ga species based on a dual-site model**

Assuming that there are two types of active sites on the Ga/H-ZSM-5 for PDH reaction at low Ga/Al ratios, i.e., BAS and exchanged Ga species, respectively. The assumption is reasonable since linear increase relationship between  $\text{TOF}_{\text{Al}}$  and Ga/Al ratio has been observed at low Ga/Al ratios (Figure 1). Thus, the  $\text{TOF}_{\text{Al}}$  can be decoupled by the contribution from remaining BAS and exchanged Ga species, as shown in eq S1:

$$\text{TOF}_{\text{Al}} = x_1 \cdot \text{TOF}_1 + x_2 \cdot \text{TOF}_2 \quad (\text{S1})$$

where  $x_1$  and  $x_2$  represent the ratio of remaining BAS/Al ratio and Ga/Al ratio, respectively.  $\text{TOF}_1$  and  $\text{TOF}_2$  represent the  $\text{TOF}_{\text{H}^+}$  (PDH rate normalized on a per BAS basis) and the TOF of exchanged Ga species, respectively. We note that  $x_1 + x_2 < 1$ , as the measured BAS density is lower than that of Al density in the parent zeolites employed to prepare Ga/H-ZSM-5.<sup>1-3</sup> The TOF of the exchanged Ga species could be determined from  $\text{TOF}_{\text{Ga}}$  (shown in Figure 1b) divided by the stoichiometry ratio between the replacement of BAS and Ga atom determined in our previous work.<sup>1</sup> One Ga atom roughly replaces one BAS at low Ga/Al ratio ( $\leq 0.5$ ) on Si/Al ratio of 15, and one Ga atom roughly replaces 0.6 BAS at low Ga/Al ratio ( $\leq 0.52$ ) on Si/Al ratio of 39.<sup>1</sup> TOF could be expressed as eq S2 below:

$$\text{TOF} = k \cdot P_{\text{propane}} = A \cdot e^{-E_a/RT} \cdot P_{\text{propane}} \quad (\text{S2})$$

where  $k$  and  $P_{\text{propane}}$  represent the rate constant and the partial pressure of propane, respectively.  $A$ ,  $E_a$  and  $R$  represent pre-exponential factor, activation energy, and gas constant, respectively. Multiple studies have confirmed that propane is first order in the reaction.<sup>4, 5</sup> Thus, the  $\text{TOF}_{\text{Al}}$  can be represented as shown in eq S3:

$$\text{TOF}_{\text{Al}} = x_1 \cdot A_1 \cdot e^{-E_{a1}/RT} \cdot P_{\text{propane}} + x_2 \cdot A_2 \cdot e^{-E_{a2}/RT} \cdot P_{\text{propane}} \quad (\text{S3})$$

where the subscripts 1 and 2 represent the BAS and exchanged Ga species ( $\text{Ga}^+-\text{H}^+$  pair sites or isolated  $\text{Ga}^+$  sites), respectively. We note that the  $\text{H}^+$  in the  $\text{Ga}^+-\text{H}^+$  pair site is still counted as a BAS capable of catalyzing the PDH in the current model. This assumption is not expected to have a significant impact on

---

the overall result because of the low concentration of  $\text{Ga}^+-\text{H}^+$  pair sites, e.g., highest density of the  $\text{Ga}^+-\text{H}^+$  pair sites in Ga/H-ZSM-5 (Si/Al = 15) occurs as a Ga/Al ratio of 0.042.<sup>1</sup> Based on eq S2, the apparent activation  $E_{\text{app}}$  could be derived to eqs S4 and S5:

$$E_{\text{app}} = -R \frac{d(\ln(\text{TOF}_{\text{Al}}))}{d(1/T)} = -\frac{R}{\text{TOF}_{\text{Al}}} \left[ x_1 \cdot A_1 \cdot P_{\text{propane}} \cdot e^{-E_{\text{a1}}/RT} \left( \frac{-E_{\text{a1}}}{R} \right) + x_2 \cdot A_2 \cdot P_{\text{propane}} \cdot e^{-E_{\text{a2}}/RT} \left( \frac{-E_{\text{a2}}}{R} \right) \right] \quad (\text{S4})$$

$$E_{\text{app}} = \frac{x_1 \cdot \text{TOF}_1 \cdot E_{\text{a1}} + x_2 \cdot \text{TOF}_2 \cdot E_{\text{a2}}}{x_1 \cdot \text{TOF}_1 + x_2 \cdot \text{TOF}_2} \quad (\text{S5})$$

Based on eq S5, The  $E_{\text{app}}$  of the exchanged Ga species on Si/Al ratios of 15 and 39 with Ga/Al ratio from 0 – 0.042 and 0 – 0.55 were obtained by fitting using the least square method. The fitting conditions and results are summarized as in Table S3.

**Table S3.** Summary of simulation conditions and results of the dual-site model.

| Si/Al<br>ratio | Ga/Al<br>range | $x_1+x_2^a$ | TOF <sub>1</sub><br>(mol <sub>C<sub>3</sub>H<sub>8</sub></sub> ·mol <sub>H</sub> <sup>-1</sup> ·s <sup>-1</sup> ) <sup>b</sup> | TOF <sub>2</sub><br>(mol <sub>C<sub>3</sub>H<sub>8</sub></sub> ·mol <sub>Ga</sub> <sup>-1</sup> ·s <sup>-1</sup> ) <sup>c</sup> | Ea <sub>1</sub><br>(kJ·mol <sup>-1</sup> ) <sup>d</sup> | Ea <sub>2</sub><br>(kJ·mol <sup>-1</sup> ) <sup>e</sup> | R <sup>2</sup> |
|----------------|----------------|-------------|--------------------------------------------------------------------------------------------------------------------------------|---------------------------------------------------------------------------------------------------------------------------------|---------------------------------------------------------|---------------------------------------------------------|----------------|
| 15             | 0-0.042        | 0.612       | 0.00337±0.00008                                                                                                                | 0.597±0.091                                                                                                                     | 188±7.9                                                 | 90.8±1.5                                                | 0.997          |
| 39             | 0-0.55         | 0.694       | 0.00222±0.00017                                                                                                                | 0.075±0.008                                                                                                                     | 156±4.1                                                 | 117±2.4                                                 | 0.934          |

<sup>a</sup> $x_1$  and  $x_2$  represent the fraction of BAS, Ga<sup>+</sup>-H<sup>+</sup> pair sites (Si/Al = 15) or isolated Ga<sup>+</sup> sites (Si/Al = 39) to the Al amount of each sample, respectively.  $x_1+x_2$  represents the BAS/Al ratio of H-ZSM-5 with each Si/Al ratio, BAS concentration is determined on pyridine adsorption FTIR results and Al content are calculated based on Si/Al ratio determined by XRF (Table S1). The chemical stoichiometry that one Ga atom roughly replaces one BAS at low Ga/Al ratio has been applied on Si/Al ratio of 15, and that one Ga atom roughly replaces 0.6 BAS at low Ga/Al ratio has been applied on Si/Al ratio of 39.<sup>1</sup>

<sup>b</sup>TOF<sub>H+</sub> (PDH rate on a per BAS basis) was determined from the TOF<sub>Al</sub> divided by the BAS/Al ratio on H-ZSM-5 without Ga. (0.612 on Si/Al ratio of 15 and 0.694 on Si/Al ratio of 39).

<sup>c</sup>TOF<sub>Ga+-H+</sub> (Si/Al = 15) and TOF<sub>Ga+</sub> (Si/Al = 39) on Ga/H-ZSM-5 at low Ga/Al ratios were determined from the TOF<sub>Ga</sub> (shown in Figure 1b) divided by the stoichiometry ratio between the replacement of BAS and Ga atom on the reduced Ga/H-ZSM-5 determined in our previous work.<sup>1</sup> (1 on Si/Al ratio of 15 and 0.6 on Si/Al ratio of 39).

<sup>d</sup>E<sub>app</sub> of PDH on BAS obtained by parent H-ZSM-5 without Ga.

<sup>e</sup>Fitted E<sub>app</sub> of PDH on exchanged Ga species, which decouples the effect of remaining BAS.

A triple-site model is needed when BAS,  $\text{Ga}^+-\text{H}^+$  pair sites and isolated  $\text{Ga}^+$  sites are all present on a catalyst with Si/Al ratio of 28 and Ga/Al ratio at or below 0.52. The fraction of the exchanged Ga in the forms of  $\text{Ga}^+-\text{H}^+$  pair sites and isolated  $\text{Ga}^+$  sites to the Al amount can be determined based on eqs S6–S8:

$$\text{TOF}_{\text{Al}} = x_1 \cdot \text{TOF}_1 + x_2 \cdot \text{TOF}_2 + x_3 \cdot \text{TOF}_3 \quad (\text{S6})$$

$$x_1 + x_2 + x_3 = \text{BAS/Al ratio} \quad (\text{S7})$$

$$x_2 + x_3 = \text{Ga/Al ratio} \quad (\text{S8})$$

where the subscripts 1, 2 and 3 represent the BAS,  $\text{Ga}^+-\text{H}^+$  pair sites and isolated  $\text{Ga}^+$  sites, respectively. It should be noted that  $\text{TOF}_1$ ,  $\text{TOF}_2$  and  $\text{TOF}_3$  are known variables since they are determined via either direct measurements ( $\text{TOF}_1$ ) or fitting in the dual-site model. Similar derivations as in the dual-site model lead to the following expression of the  $E_{\text{app}}$ :

$$E_{\text{app}} = \frac{x_1 \cdot \text{TOF}_1 \cdot E_{a1} + x_2 \cdot \text{TOF}_2 \cdot E_{a2} + x_3 \cdot \text{TOF}_3 \cdot E_{a3}}{x_1 \cdot \text{TOF}_1 + x_2 \cdot \text{TOF}_2 + x_3 \cdot \text{TOF}_3} \quad (\text{S9})$$

where  $E_{a1}$ ,  $E_{a2}$  and  $E_{a3}$  in the triple-site model are known variables since they are determined via either direct measurements ( $E_{a1}$ ) or fitting in the dual-site model. Taking into account the experimental error for the measured activity and measured  $E_{\text{app}}$ , the fraction of three types of active sites is determined by solving eqs S6-S8 within errors of  $\pm 15\%$  (including  $\text{TOF}_1$ ,  $\text{TOF}_2$ ,  $\text{TOF}_3$ ,  $\text{TOF}_{\text{Al}}$ , BAS/Al ratio, Ga/Al ratio). Then, the  $E_{\text{app}}$  are calculated for Ga/H-ZSM-5 (Si/Al = 28) samples with  $\text{Ga/Al} \leq 0.52$  using eq S9 within errors of  $\pm 15\%$  (including  $E_{a1}$ ,  $E_{a2}$ ,  $E_{a3}$ ). The results are summarized in Table S4 and plotted in Figure 4. We note that the triple-site model cannot be applied to samples that might contain a fourth type of site, e.g.,  $\text{Ga}^+-\text{Ga}^+$ , thus, no attempt was made to use this model on Ga/H-ZSM-5 (Si/Al = 15) samples with  $\text{Ga/Al} > 0.1$ , and Ga/H-ZSM-5 (Si/Al = 28) samples with  $\text{Ga/Al} > 0.52$ .



**Table S4.** Summary of calculated fraction of different active species and  $E_{app}$  of PDH on Si/Al ratio of 28 with Ga/Al ratios ranging from 0 to 0.52.

| Ga/Al<br>ratio | $x_1^a$     | $x_2^a$     | $x_3^a$     | $E_{app}$ (cal)<br>(kJ·mol <sup>-1</sup> ) <sup>b</sup> | $E_{app}$ (exp)<br>(kJ·mol <sup>-1</sup> ) <sup>c</sup> |
|----------------|-------------|-------------|-------------|---------------------------------------------------------|---------------------------------------------------------|
| 0              | 0.664–0.898 | 0.000       | 0.000       | 140–190                                                 | 166                                                     |
| 0.025          | 0.643–0.869 | 0.000–0.000 | 0.021–0.031 | 121–164                                                 | 153                                                     |
| 0.071          | 0.604–0.817 | 0.003–0.007 | 0.054–0.079 | 94.4–137                                                | 133                                                     |
| 0.097          | 0.581–0.787 | 0.015–0.020 | 0.063–0.097 | 87.4–125                                                | 124                                                     |
| 0.015          | 0.536–0.726 | 0.039–0.046 | 0.081–0.134 | 83.4–117                                                | 110                                                     |
| 0.32           | 0.392–0.530 | 0.035–0.049 | 0.223–0.333 | 86.5–123                                                | 99.5                                                    |
| 0.44           | 0.290–0.392 | 0.014–0.034 | 0.341–0.492 | 90.6–131                                                | 99.8                                                    |
| 0.52           | 0.222–0.300 | 0.004–0.027 | 0.415–0.594 | 92.6–134                                                | 106                                                     |

<sup>a</sup> $x_1$ ,  $x_2$ , and  $x_3$  represent the fraction of BAS, Ga<sup>+</sup>–H<sup>+</sup> pair sites and isolated Ga<sup>+</sup> sites to the Al amount of each sample. The BAS/Al ratio of H-ZSM-5 with Si/Al ratio of 28 is 0.781. BAS concentration is determined on pyridine adsorption FTIR results and Al amount are calculated based on Si/Al ratio determined by XRF. Ga/Al ratios are measured by XRF. TOF<sub>Al</sub> are Al normalized PDH rates, as shown in Figure 1. TOF<sub>1</sub>, TOF<sub>2</sub> and TOF<sub>3</sub> are 0.00232, 0.597 and 0.075 mol<sub>C<sub>3</sub>H<sub>8</sub></sub> mol<sub>Ga</sub><sup>-1</sup> s<sup>-1</sup>, respectively. The fitted  $x_1$ ,  $x_2$ ,  $x_3$  are obtained by eqs S6-S8 within 15% error.

<sup>b</sup>Calculated  $E_{app}$  based on eq S9.  $E_{a1}$ ,  $E_{a2}$  and  $E_{a3}$  are 166, 90.8 and 117 kJ·mol<sup>-1</sup>, respectively. The calculated  $E_{app}$  are within 15% error.

<sup>c</sup>Experimental  $E_{app}$ .

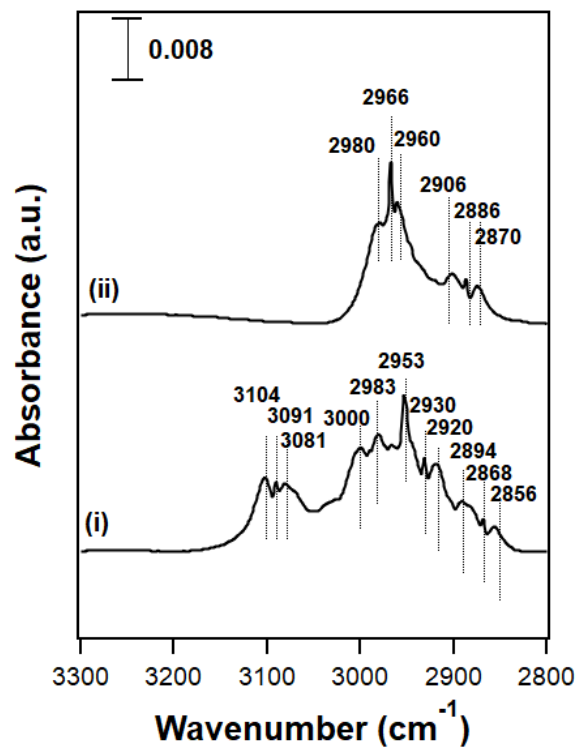

**Figure S6.** FTIR spectra of (i) C<sub>3</sub>H<sub>6</sub> with 0.27 kPa and (ii) C<sub>3</sub>H<sub>8</sub> with 0.07 kPa at 25 °C. The background spectrum was collected in the spectral cell without a sample pellet at 25 °C under vacuum.

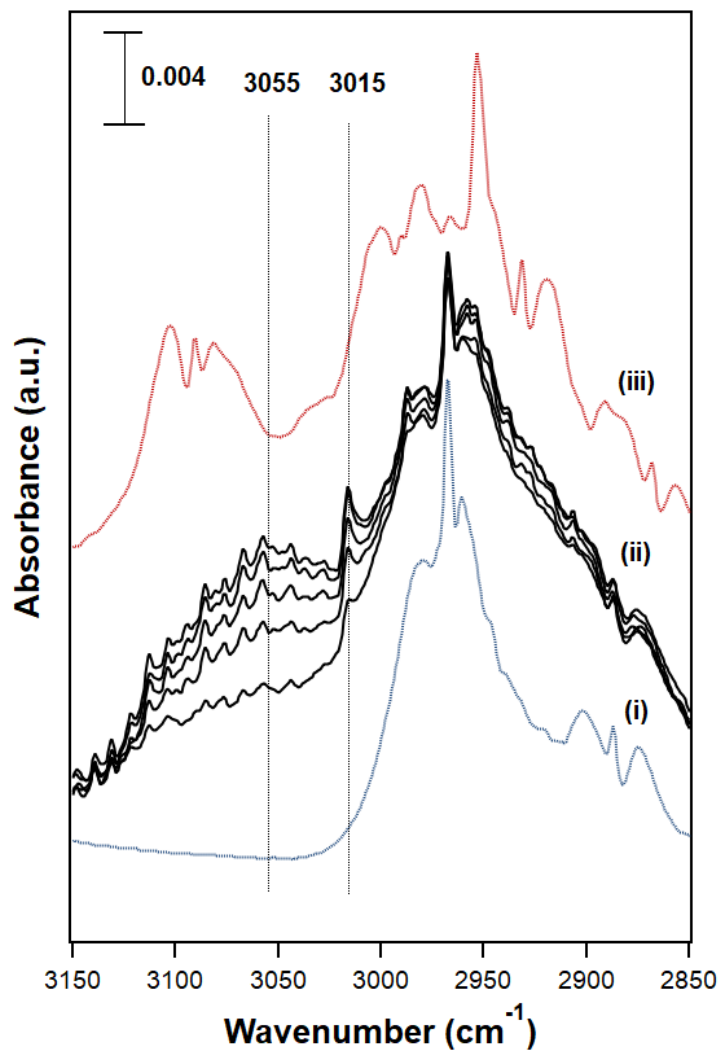

**Figure S7.** FTIR spectra of (i) C<sub>3</sub>H<sub>8</sub> gas phase, (ii) C<sub>3</sub>H<sub>8</sub> treatment on reduced Ga/H-ZSM-5 (Si/Al = 15, Ga/Al = 0.13) for 2, 4, 6, 8, and 10 min, respectively (from bottom to up, Figure 5a), and (iii) C<sub>3</sub>H<sub>6</sub> gas phase. All spectra are normalized to the highest peak intensity of the C<sub>3</sub>H<sub>8</sub> gas phase spectrum for clarity.

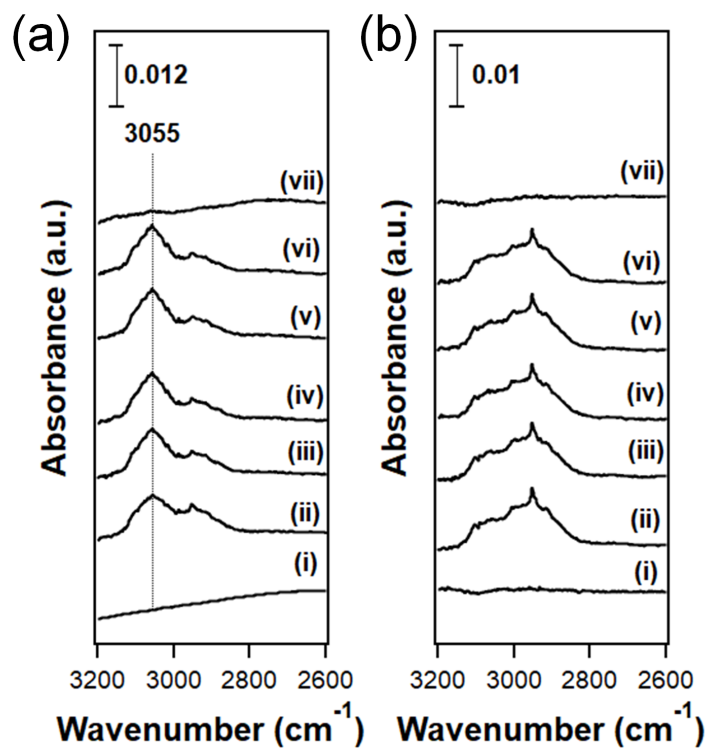

**Figure S8.** FTIR spectra of  $\text{C}_3\text{H}_6$  treatment on (a) reduced Ga/H-ZSM-5 (Si/Al = 15, Ga/Al = 0.13) and (b) H-ZSM-5 (Si/Al = 15) at 550 °C: (i) before  $\text{C}_3\text{H}_6$  treatment; (ii-vi)  $\text{C}_3\text{H}_6$  treatment (0.27 kPa) for 2, 4, 6, 8, and 10 min, respectively; (vii) after evacuation. The background spectrum is collected in the spectral cell with a dehydrated sample pellet at 550 °C under vacuum.

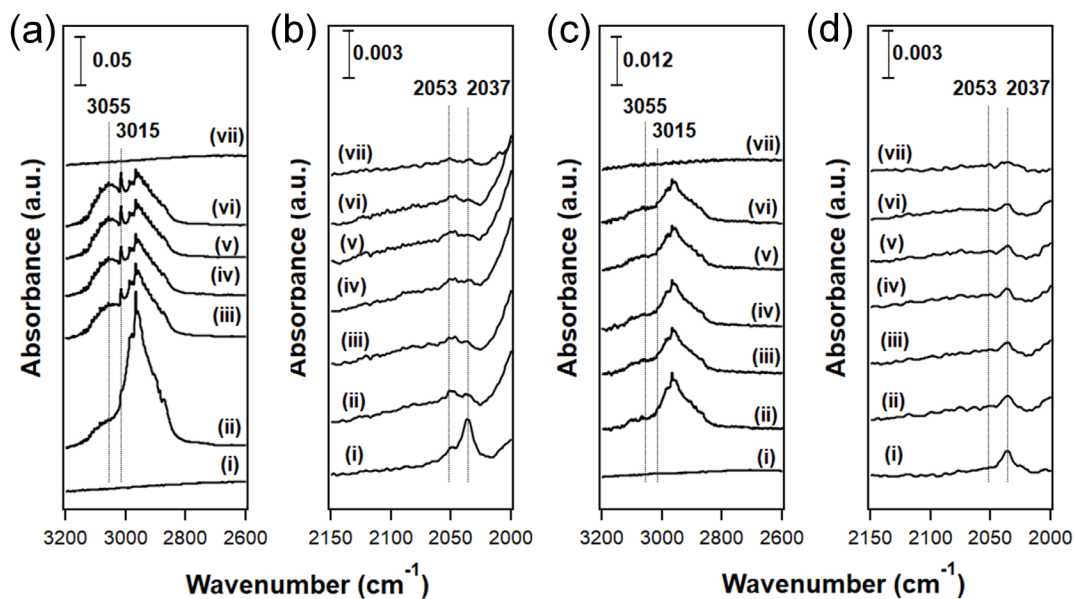

**Figure S9.** (a, b) FTIR spectra of  $\text{C}_3\text{H}_8$  treatment on reduced Ga/H-ZSM-5 (Si/Al = 15, Ga/Al = 0.13): (i) before  $\text{C}_3\text{H}_8$  treatment; (ii-vi)  $\text{C}_3\text{H}_8$  treatment (1.33 kPa) for 2, 4, 6, 8, and 10 min, respectively; (vii) after evacuation. (c, d) FTIR spectra of  $\text{C}_3\text{H}_8$  treatment on reduced Ga/H-ZSM-5 (Si/Al = 15, Ga/Al = 0.042): (i) before  $\text{C}_3\text{H}_8$  treatment; (ii-vi)  $\text{C}_3\text{H}_8$  treatment (0.27 kPa) for 2, 4, 6, 8, and 10 min, respectively; (vii) after evacuation. The background spectrum was collected in the spectral cell with a dehydrated sample pellet at 550 °C under vacuum.

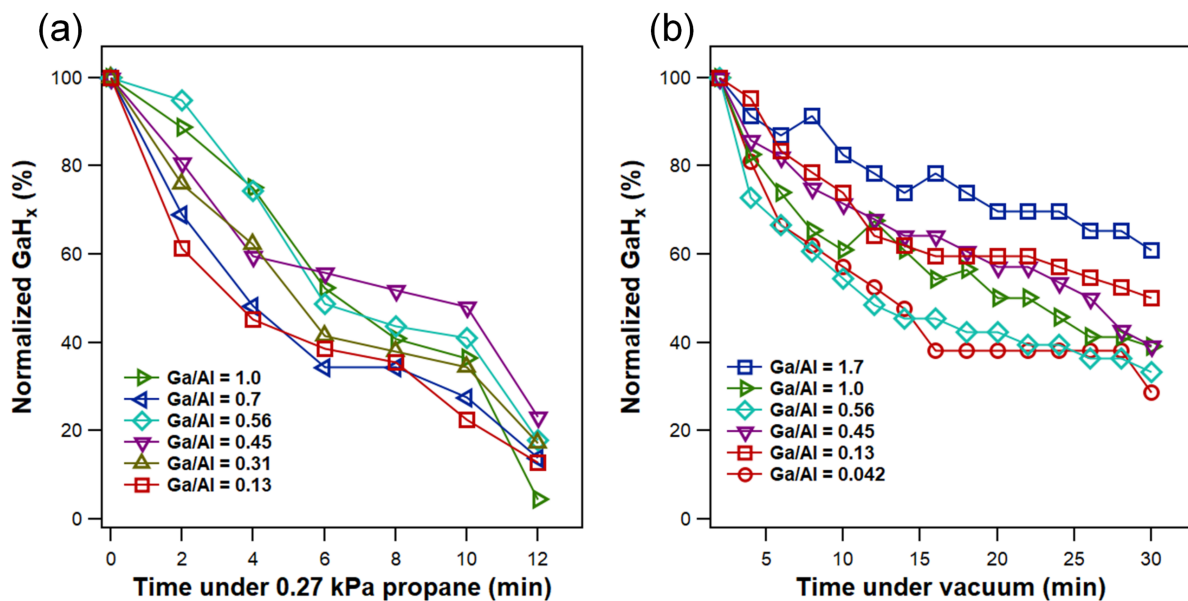

**Figure S10.** The integrated  $\text{GaH}_x$  peak area from IR spectra versus time in (a)  $\text{C}_3\text{H}_8$  (0.27 kPa) and (b) constant vacuum at 550 °C for reduced Ga/H-ZSM-5 with Si/Al ratio of 15 and varying Ga/Al ratios ranging from 0.042 to 1.7. The integrated peak area of  $\text{GaH}_x$  in (a) was normalized by the  $\text{GaH}_x$  peak area from the IR spectrum collected during the first 2 min under vacuum after reduction. The point at 12 min represents the  $\text{GaH}_x$  peak area under vacuum after  $\text{C}_3\text{H}_8$  treatment. The integrated peak area of  $\text{GaH}_x$  in (b) was normalized by the  $\text{GaH}_x$  peak area from the IR spectrum collected during the first 2 min.

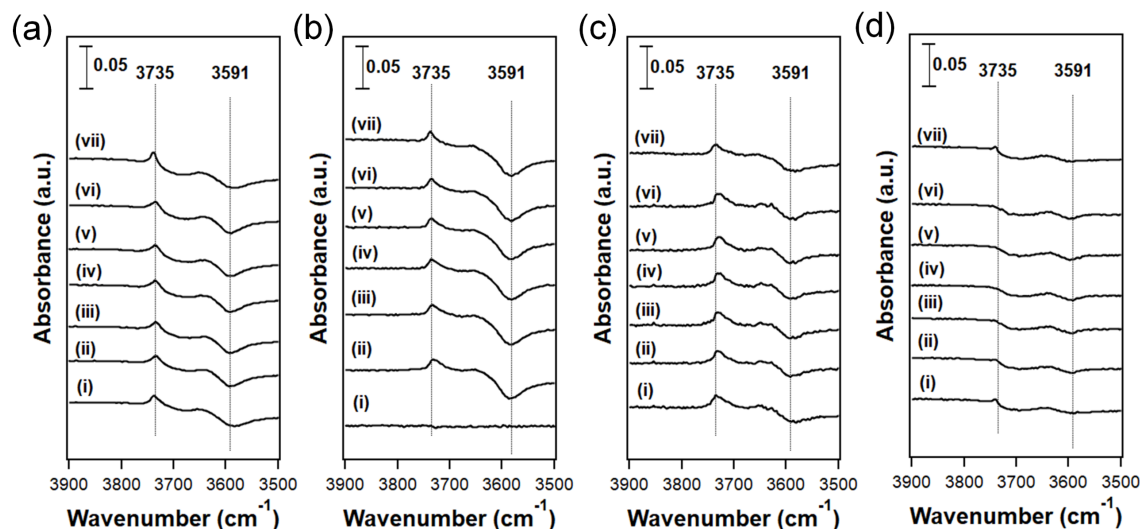

**Figure S11.** FTIR spectra of reduced Ga/H-ZSM-5 (Si/Al = 15, Ga/Al = 0.13) (a): (i) before C<sub>3</sub>H<sub>8</sub> treatment; (ii-vi) C<sub>3</sub>H<sub>8</sub> treatment (0.27 kPa) for 2, 4, 6, 8, and 10 min, respectively; (vii) after evacuation. (b): (i) before H<sub>2</sub> treatment, (ii-vii) upon evacuating H<sub>2</sub> for 2, 4, 6, 8, 10, and 30 min, respectively. (c): (i) before C<sub>3</sub>H<sub>8</sub> treatment; (ii-vi) after C<sub>3</sub>H<sub>8</sub> treatment (1.33 kPa) for 2, 4, 6, 8, and 10 min, respectively; (vii) after evacuation. (d) FTIR spectra of C<sub>3</sub>H<sub>8</sub> treatment on reduced Ga/H-ZSM-5 (Si/Al = 15, Ga/Al = 0.042): (i) before C<sub>3</sub>H<sub>8</sub> treatment; (ii-vi) C<sub>3</sub>H<sub>8</sub> treatment (0.27 kPa) for 2, 4, 6, 8, and 10 min, respectively; (vii) after evacuation. The background spectrum was collected in the spectral cell with a dehydrated sample pellet at 550 °C under vacuum.

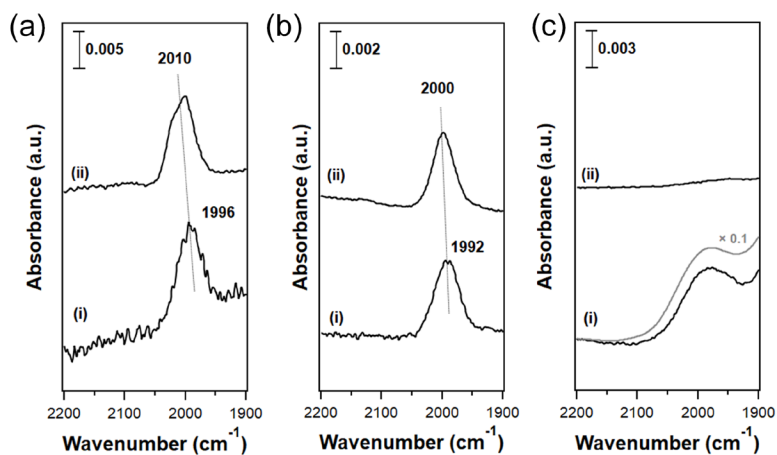

**Figure S12.** FTIR spectra of reduced (a) Ga<sub>2</sub>O<sub>3</sub> and (b) Ga/Al<sub>2</sub>O<sub>3</sub> from (i) 550 °C to (ii) 150 °C. (c): reduced (i) Ga/MFI and (ii) Ga/SiO<sub>2</sub> at 550 °C. The background spectrum in (c) was collected in the spectral cell with a dehydrated sample pellet at corresponding temperature under vacuum. Gray traces in (c) were collected at 550 °C after dehydration based on the background spectrum collected in the spectral cell without a sample pellet at the room temperature under vacuum, suggesting that the detected peaks in (c) after reduction is due to the minor change of Si-O-Si structure rather than the formation of GaH<sub>x</sub>.



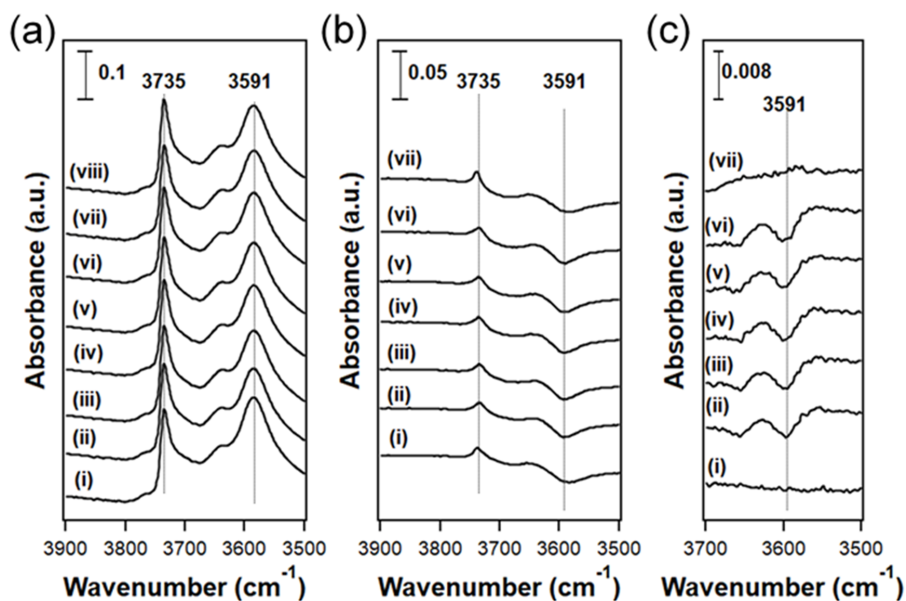

**Figure S13.** FTIR spectra of  $C_3H_8$  treatment on Ga/H-ZSM-5 (Si/Al = 15 and Ga/Al = 0.13) at 550 °C using different backgrounds: (a) spectra were collected using the background collected in the spectral cell without a sample pellet at the room temperature under vacuum. (i) after dehydration; (ii) after reduction (before  $C_3H_8$  treatment); (iii-vii)  $C_3H_8$  treatment (0.27 kPa) for 2, 4, 6, 8, and 10 min, respectively; (viii) after evacuation. (b) spectra were collected using the background collected in the spectral cell with a sample pellet dehydrated at 550 °C under vacuum: (i) before  $C_3H_8$  treatment; (ii-vi)  $C_3H_8$  treatment (0.27 kPa) for 2, 4, 6, 8, and 10 min, respectively; (vii) after evacuation. (c) spectra were collected using the background collected in the spectral cell with a sample pellet reduced at 550 °C under vacuum: (i) before  $C_3H_8$  treatment; (ii-vi)  $C_3H_8$  treatment (0.27 kPa) for 2, 4, 6, 8, and 10 min, respectively; (vii) after evacuation.

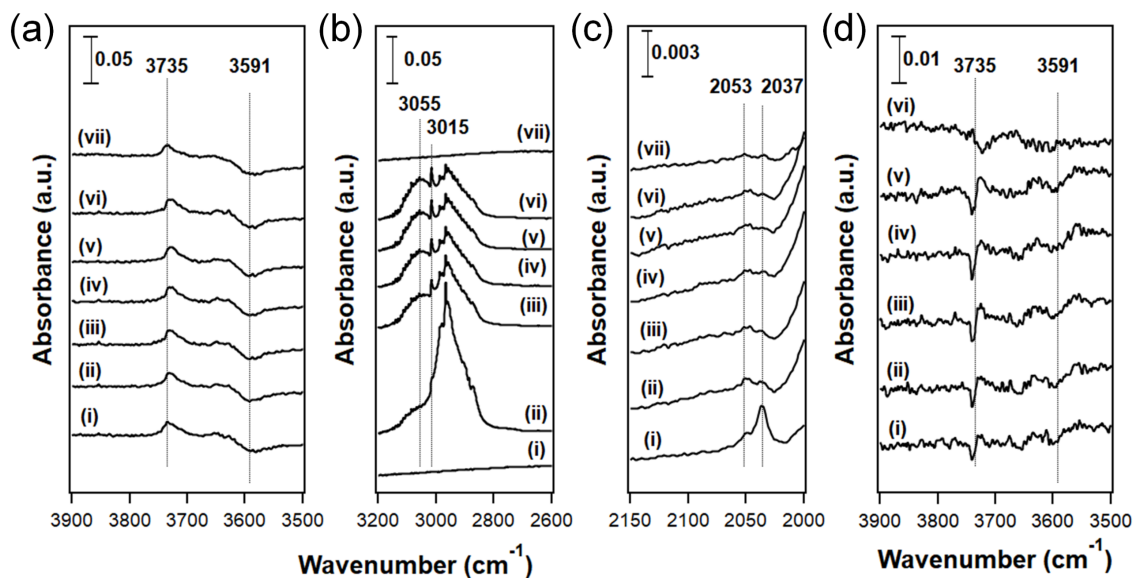

**Figure S14.** FTIR spectra of (a-c)  $\text{C}_3\text{H}_8$  treatment on reduced Ga/H-ZSM-5 ( $\text{Si}/\text{Al} = 15$  and  $\text{Ga}/\text{Al} = 0.13$ ) at  $550\text{ }^\circ\text{C}$ : (i) before  $\text{C}_3\text{H}_8$  treatment; (ii-vi)  $\text{C}_3\text{H}_8$  treatment (1.33 kPa) for 2, 4, 6, 8, and 10 min, respectively; (vii) after evacuation. (d) spectra (i-vi) are obtained by subtracting spectrum (i) from spectrum (ii-vii) in (a). The background spectrum was collected in the spectral cell with a sample pellet dehydrated at  $550\text{ }^\circ\text{C}$  under vacuum.

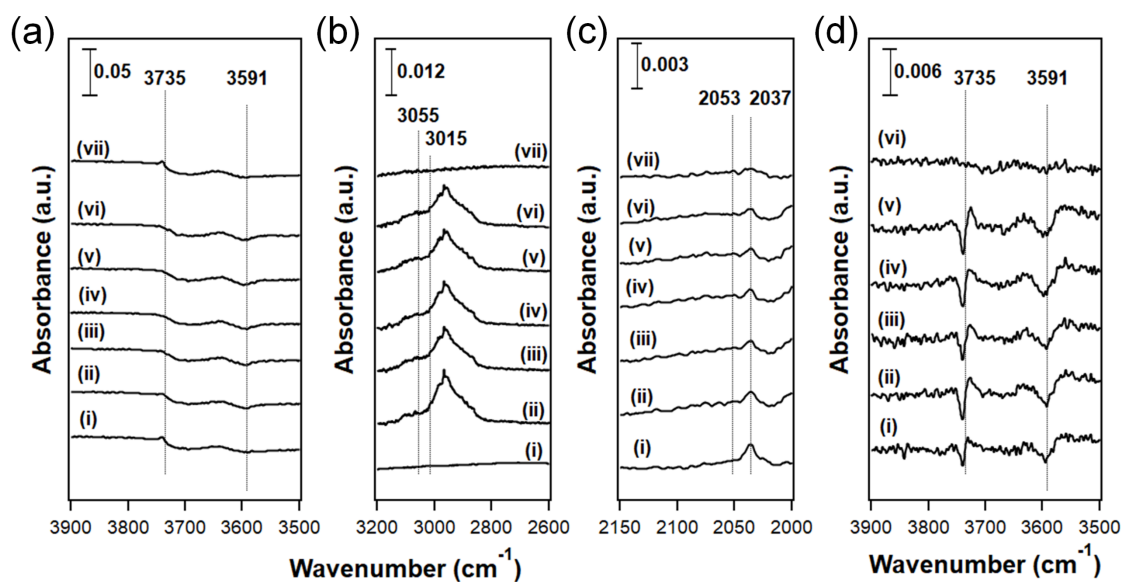

**Figure S15.** FTIR spectra of (a-c)  $\text{C}_3\text{H}_8$  treatment on reduced Ga/H-ZSM-5 ( $\text{Si}/\text{Al} = 15$  and  $\text{Ga}/\text{Al} = 0.042$ ) at  $550^\circ\text{C}$ : (i) before  $\text{C}_3\text{H}_8$  treatment; (ii-vi)  $\text{C}_3\text{H}_8$  treatment (0.27 kPa) for 2, 4, 6, 8, and 10 min, respectively; (vii) after evacuation. (d) spectra (i-vi) are obtained by subtracting spectrum (i) from spectrum (ii-vii) in (a). The background spectrum was collected in the spectral cell with a sample pellet dehydrated at  $550^\circ\text{C}$  under vacuum.

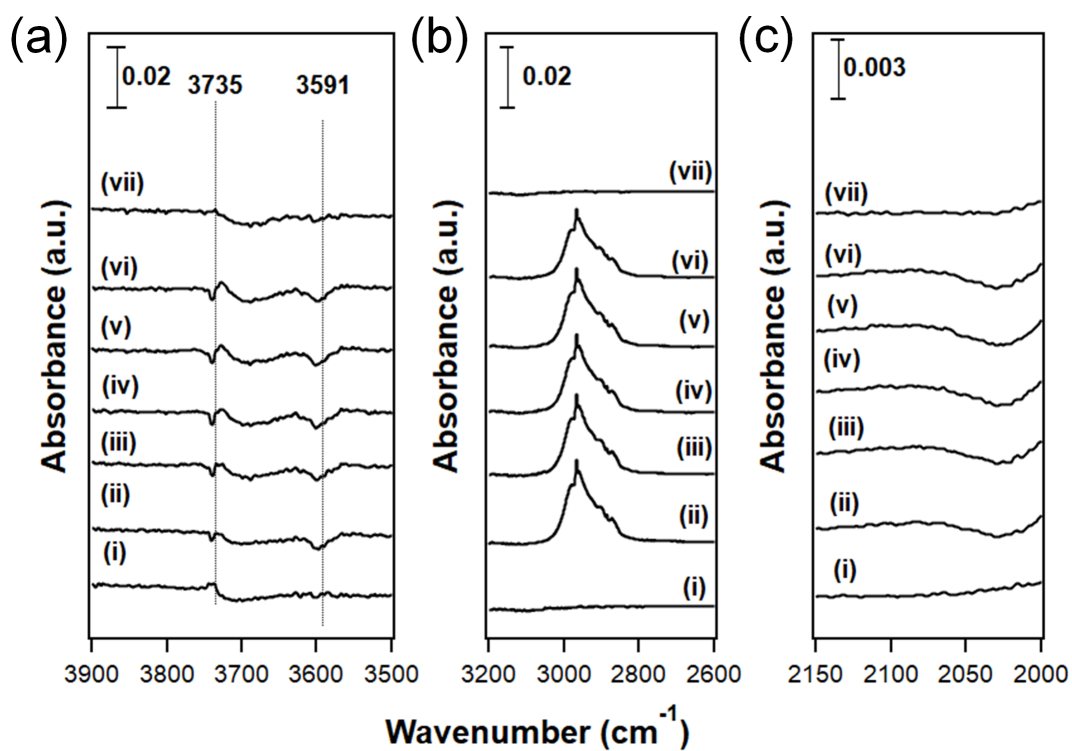

**Figure S16.** FTIR spectra of  $\text{C}_3\text{H}_8$  treatment on H-ZSM-5 (Si/Al = 15) at 550 °C in (a) high and (b, c) low wavenumber ranges: (i) before  $\text{C}_3\text{H}_8$  treatment; (ii-vi)  $\text{C}_3\text{H}_8$  treatment (0.27 kPa) for 2, 4, 6, 8, and 10 min, respectively; (vii) after evacuation. The background spectrum was collected in the spectral cell with a dehydrated sample pellet at 550 °C under vacuum.

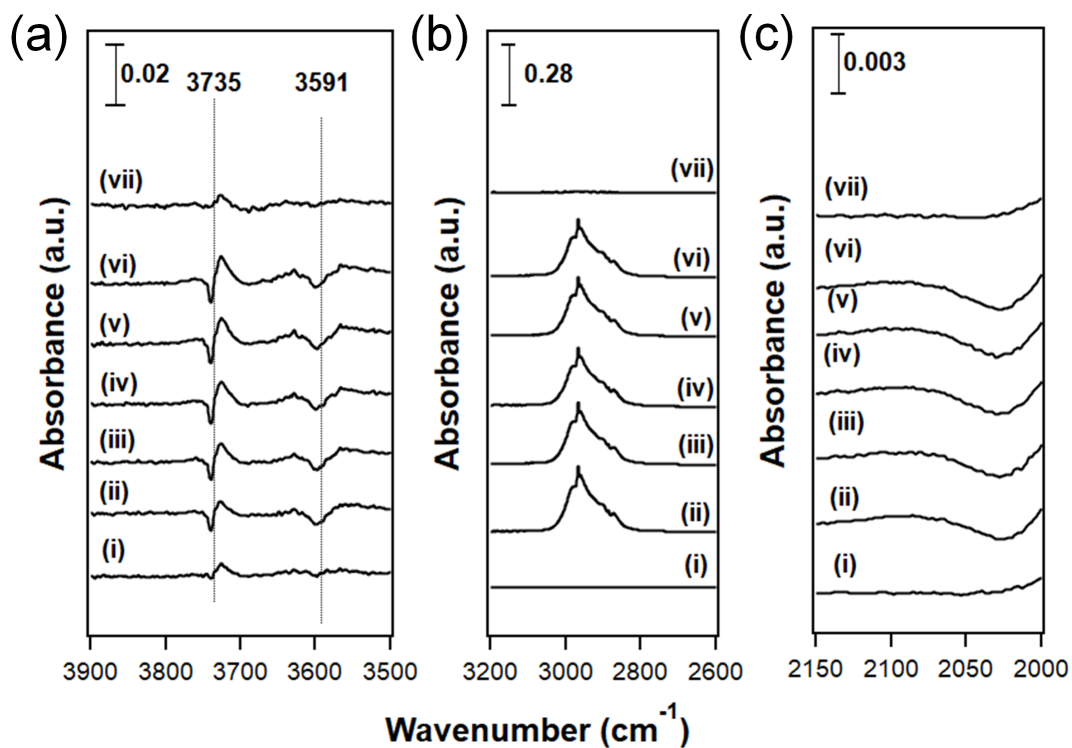

**Figure S17.** FTIR spectra of  $C_3H_8$  treatment on H-ZSM-5 (Si/Al = 15) at 550 °C in (a) high and (b, c) low wavenumber ranges: (i) before  $C_3H_8$  treatment; (ii-vi)  $C_3H_8$  treatment (1.33 kPa) for 2, 4, 6, 8, and 10 min, respectively; (vii) after evacuation. The background spectrum is collected in the spectral cell with a dehydrated sample pellet at 550 °C under vacuum.

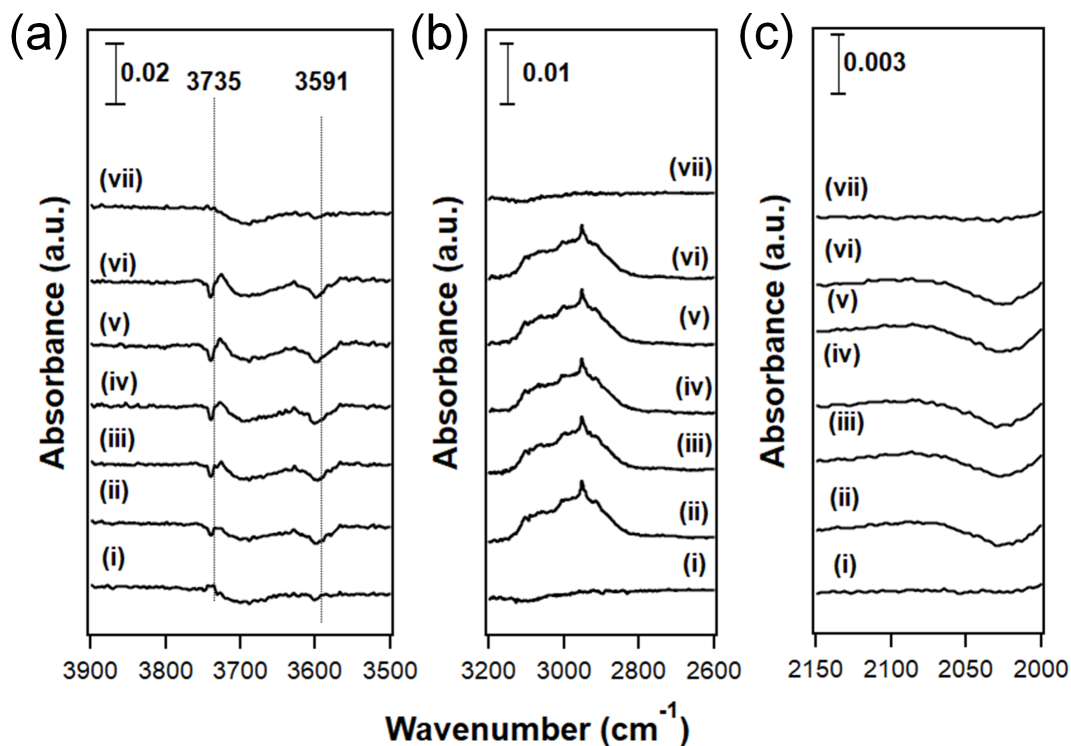

**Figure S18.** FTIR spectra of  $\text{C}_3\text{H}_6$  treatment on H-ZSM-5 (Si/Al = 15) at 550 °C in (a) high and (b, c) low wavenumber ranges: (i) before  $\text{C}_3\text{H}_6$  treatment; (ii-vi)  $\text{C}_3\text{H}_6$  treatment (0.27 kPa) for 2, 4, 6, 8, and 10 min, respectively; (vii) after evacuation. The background spectrum is collected in the spectral cell with a dehydrated sample pellet at 550 °C under vacuum.

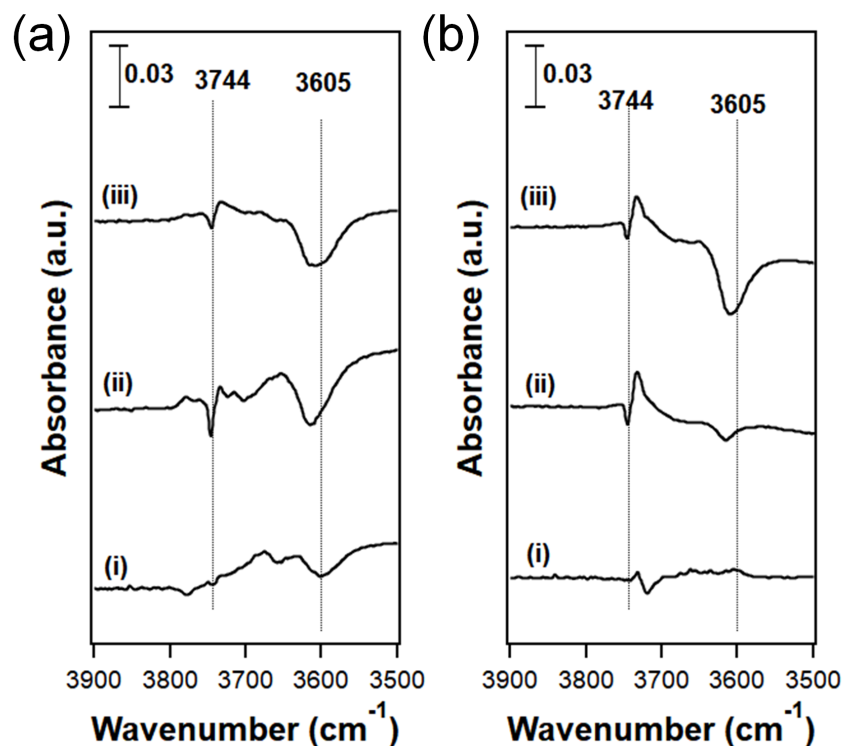

**Figure S19.** FTIR spectra (OH region) of Ga/H-ZSM-5 cooling in the presence of  $\text{C}_3\text{H}_8$  at 150 °C: (a) H-ZSM-5 (Si/Al = 15) with Ga/Al ratios of (i) 0, (ii) 0.042, (iii) 0.13 and (b) H-ZSM-5 (Si/Al = 39) with Ga/Al ratios of (i) 0, (ii) 0.12, (iii) 0.44. The background spectrum was collected in the spectral cell with a sample pellet dehydrated at 550 °C and cooled down to 150 °C under vacuum.

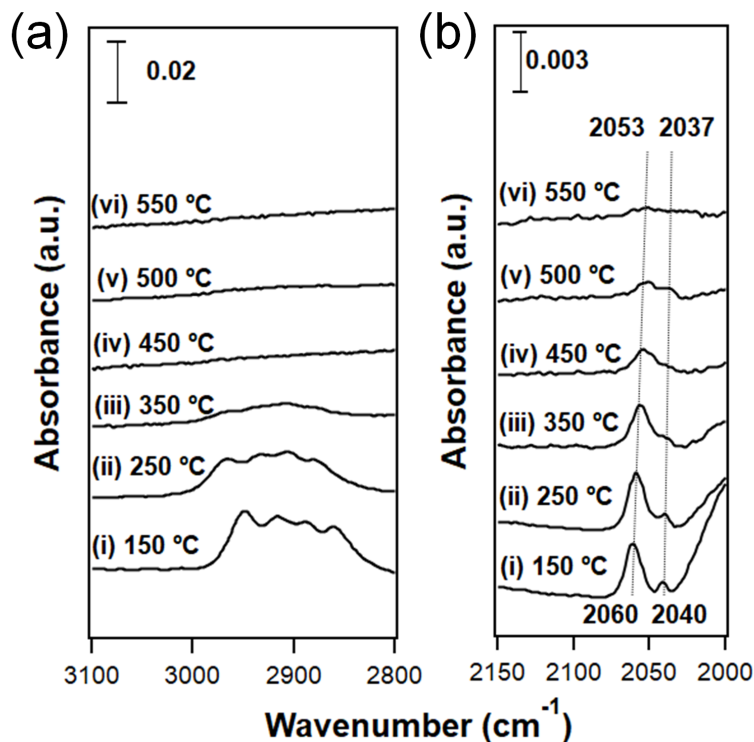

**Figure S20.** FTIR spectra of thermal treatment on  $\text{C}_3\text{H}_8$  treated Ga/H-ZSM-5 (Si/Al = 15, Ga/Al = 0.13) from 150 to 550 °C (indicated in the figure legends) in (a) high and (b) low wavenumber ranges. The samples were reduced at 550 °C, and cooled down under 1.33 kPa  $\text{C}_3\text{H}_8$  to 150 °C, followed by evacuation. The background spectrum is collected with the sample at the corresponding temperature under vacuum after dehydration.



---

## References

- (1) Yuan, Y.; Brady, C.; Annamalai, L.; Lobo, R. F.; Xu, B. Ga Speciation in Ga/H-ZSM-5 by In-situ Transmission FTIR Spectroscopy. *J. Catal.* **2021**, 393, 60–69.
- (2) Gould, N. S.; Xu, B. Temperature-Programmed Desorption of Pyridine on Zeolites in the Presence of Liquid Solvents. *ACS Catal.* **2018**, 8, 8699–8708.
- (3) Song, C.; Chu, Y.; Wang, M.; Shi, H.; Zhao, L.; Guo, X.; Yang, W.; Shen, J.; Xue, N.; Peng, L.; Ding, W. Cooperativity of Adjacent Brønsted Acid Sites in MFI Zeolite Channel Leads to Enhanced Polarization and Cracking of Alkanes. *J. Catal.* **2017**, 349, 163–174.
- (4) Phadke, N. M.; Mansoor, E.; Bondil, M.; Head-Gordon, M.; Bell, A. T. Mechanism and Kinetics of Propane Dehydrogenation and Cracking over Ga/H-MFI Prepared via Vapor-Phase Exchange of H-MFI with GaCl<sub>3</sub>. *J. Am. Chem. Soc.* **2019**, 141, 1614–1627.
- (5) Schreiber, M. W.; Plaisance, C. P.; Baumgärtl, M.; Reuter, K.; Jentys, A.; Bermejo-Deval, R.; Lercher, J. A. Lewis–Brønsted Acid Pairs in Ga/H-ZSM-5 To Catalyze Dehydrogenation of Light Alkanes. *J. Am. Chem. Soc.* **2018**, 140, 4849–4859.
